# Supplementary material for: Versatile, in-line optical oxygen tension sensors for continuous monitoring during ex vivo kidney perfusion
Source: Royal Society of Chemistry journal article supplement (doi:10.1039/d3sd00240c), 2024-01-01

Counts

$10^3$

$10^2$

$10^1$

$10^0$

0

100

200

300

400

500

600

700

800

900

Time/ $\mu$ s

Stand-alone PPMA O<sub>2</sub>-sensing film ( $\tau(0)=97.4\mu$ s)

PVC-backed PPMA O<sub>2</sub>-sensing film ( $\tau(0)=98.2\mu$ s)

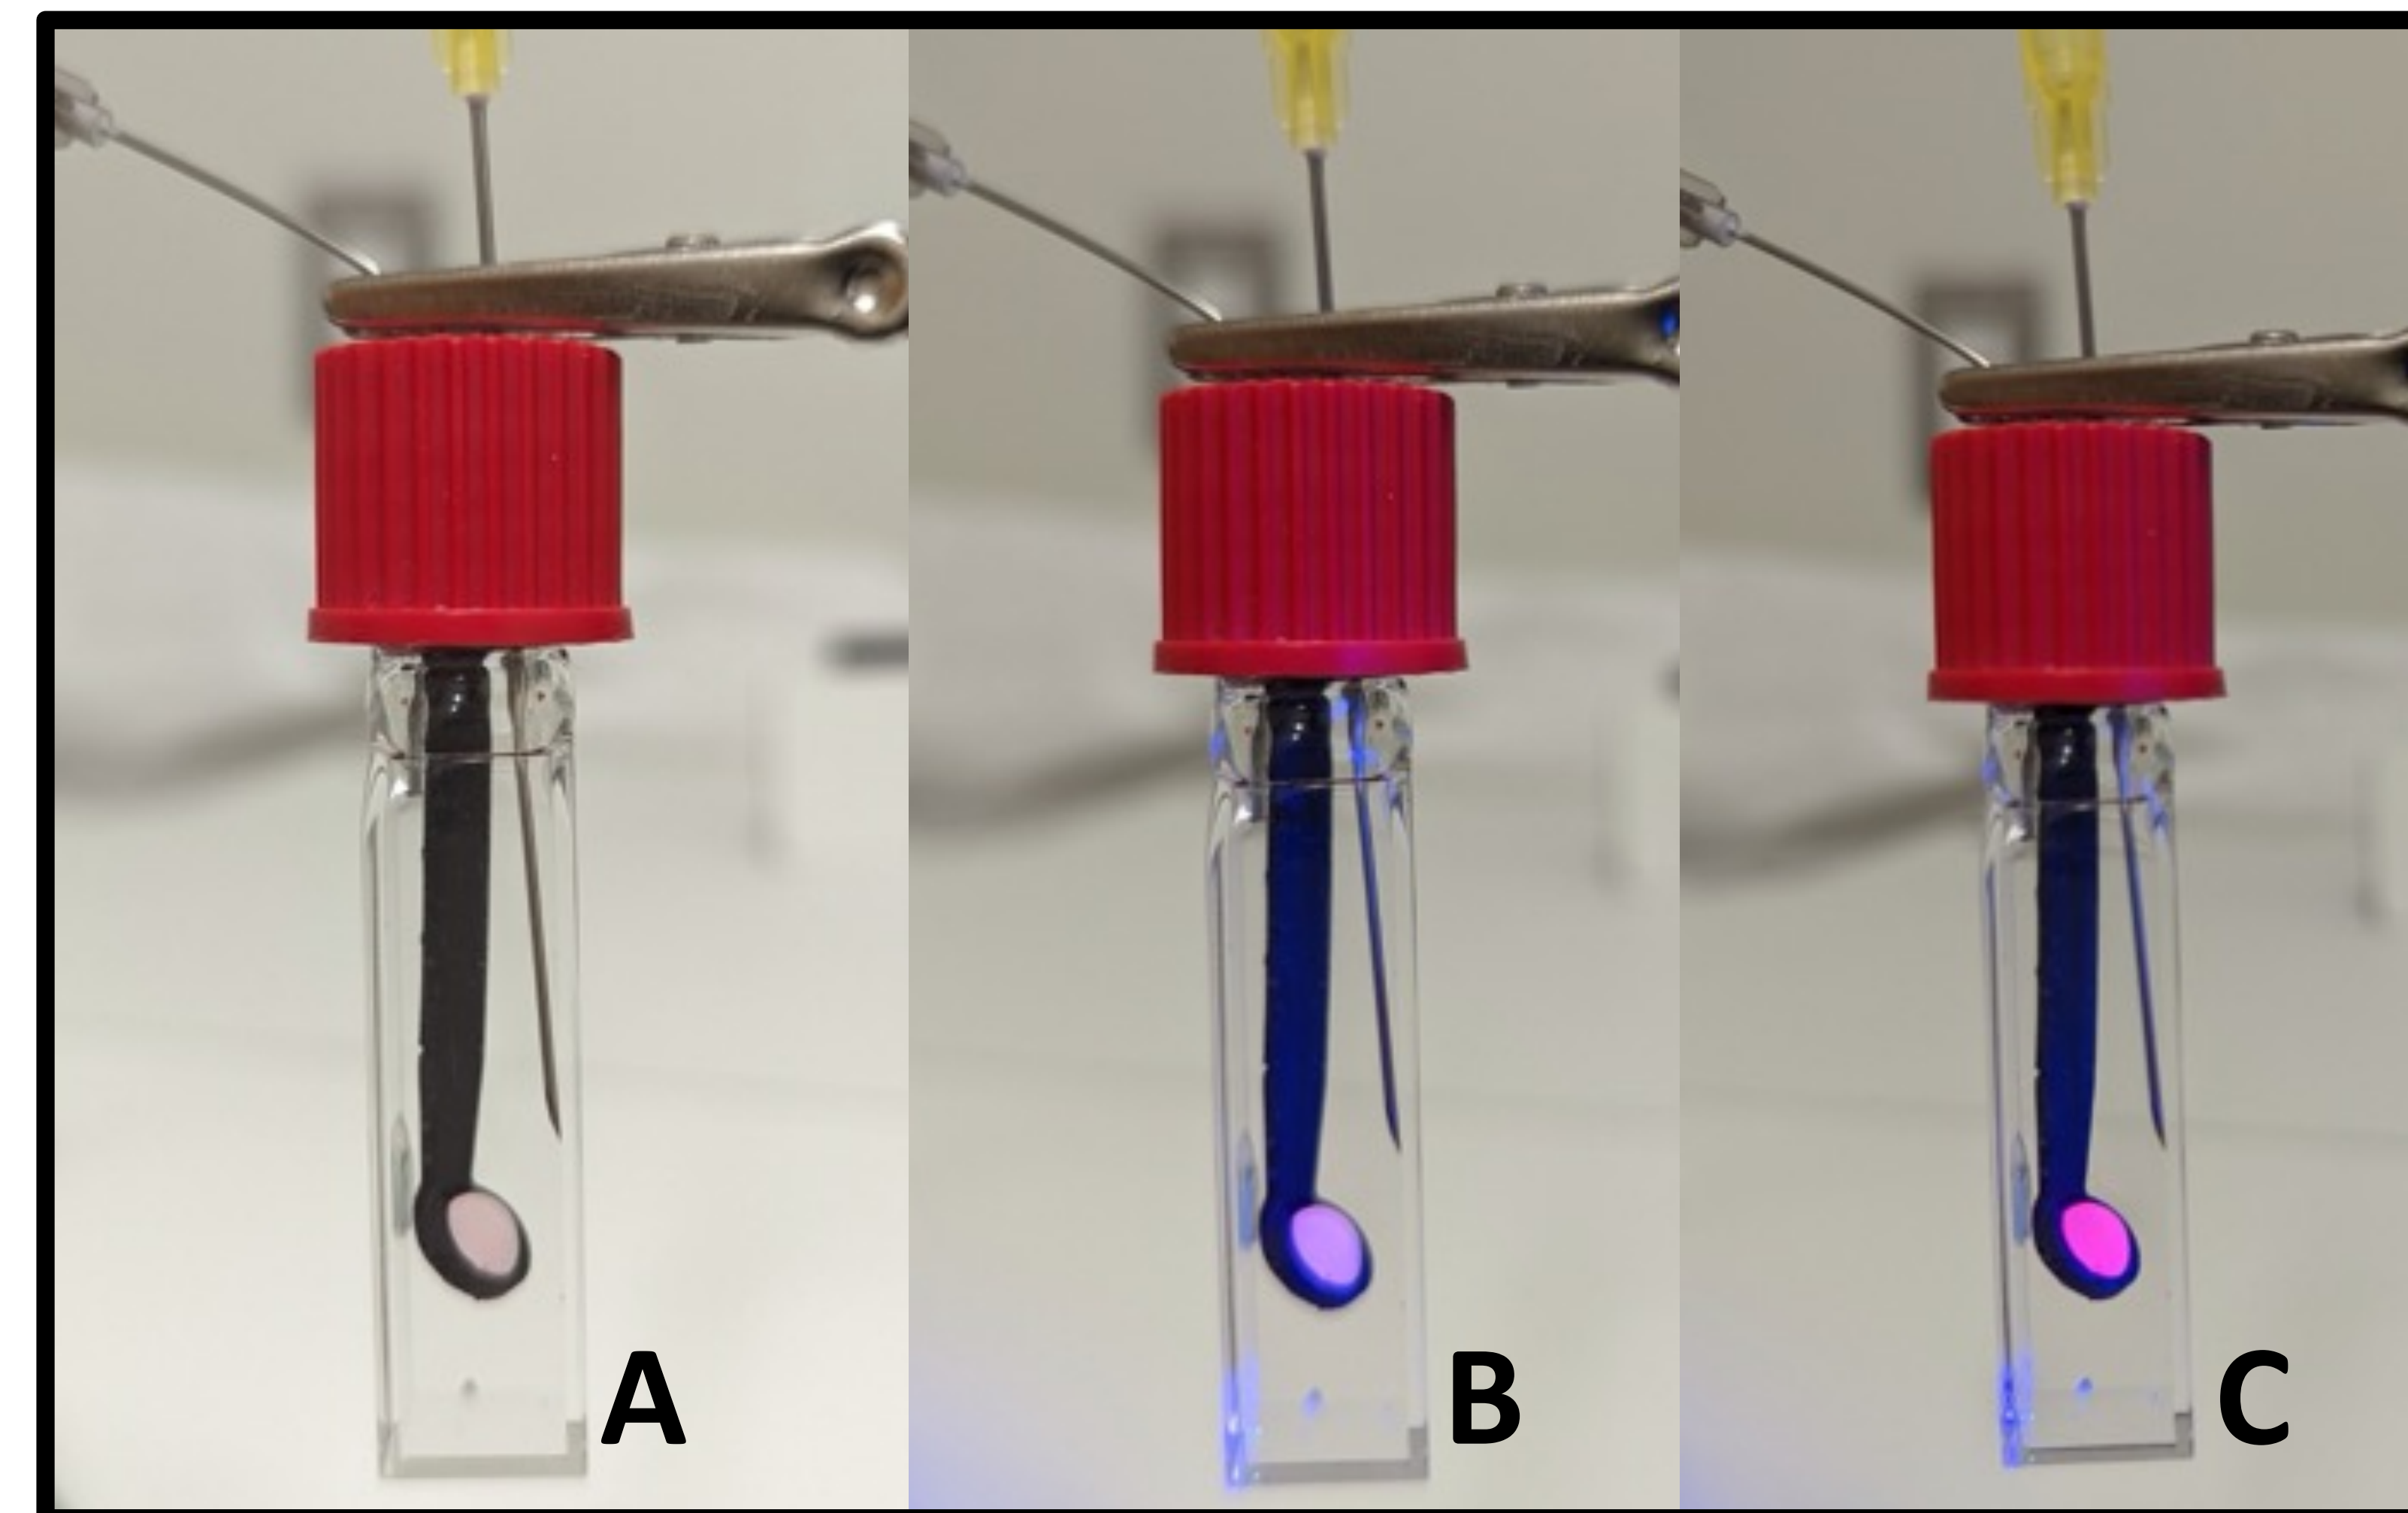

Supplement: d3sd00240c2.zip [file d3sd00240c2.zip]
