# Supplementary material for: Versatile, in-line optical oxygen tension sensors for continuous monitoring during ex vivo kidney perfusion
Source: Royal Society of Chemistry journal article supplement (doi:10.1039/d3sd00240c), 2024-01-01

**Water-jacketed  
perfusate  
reservoir**

**Centrifugal  
pump**

**Electronic readout  
sensor alignment over  
the O<sub>2</sub>-sensing material**

**Analytical  
pO<sub>2</sub> monitor**

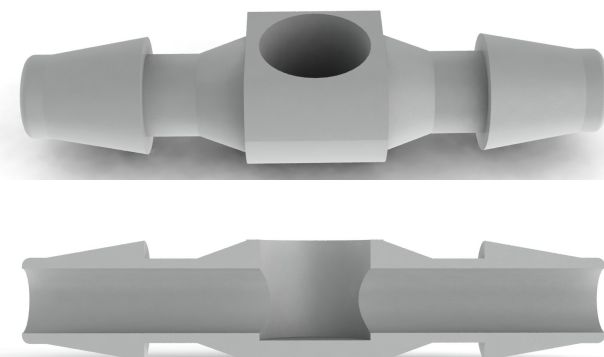

Supplement: d3sd00240c2.zip [file d3sd00240c2.zip]
