# Supplementary figures and images for: Versatile, in-line optical oxygen tension sensors for continuous monitoring during ex vivo kidney perfusion
Source: Royal Society of Chemistry journal article supplement (doi:10.1039/d3sd00240c), 2024-01-01

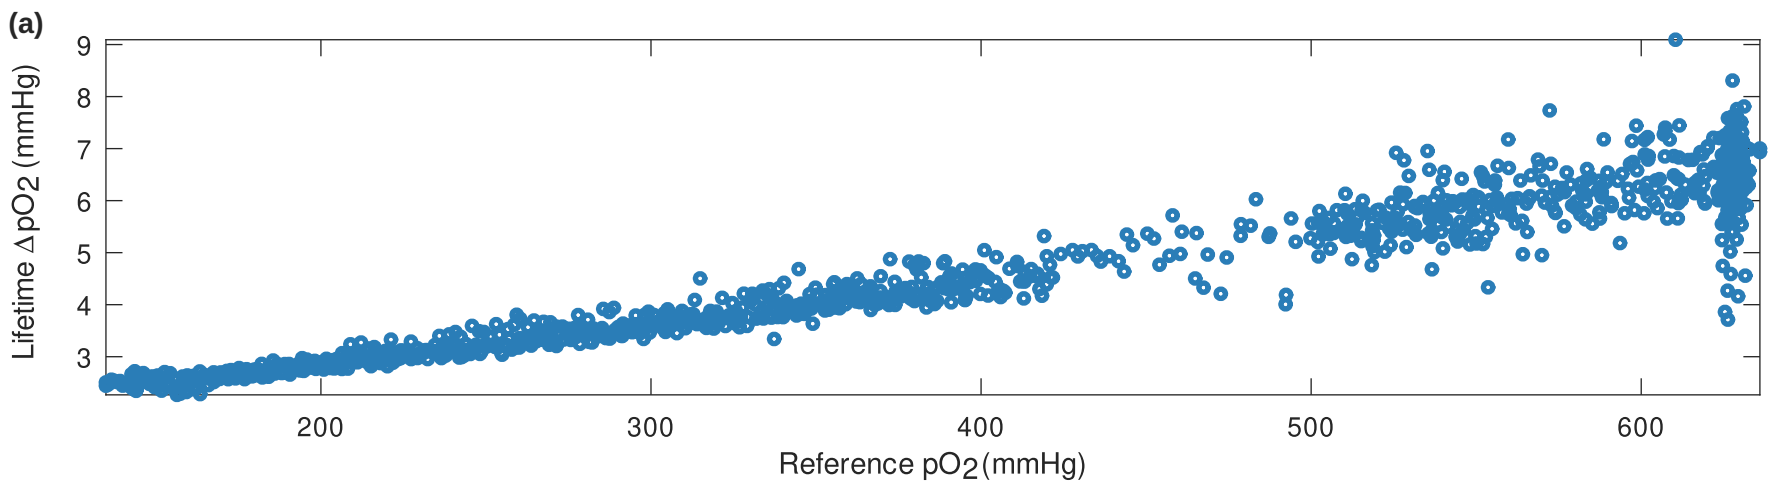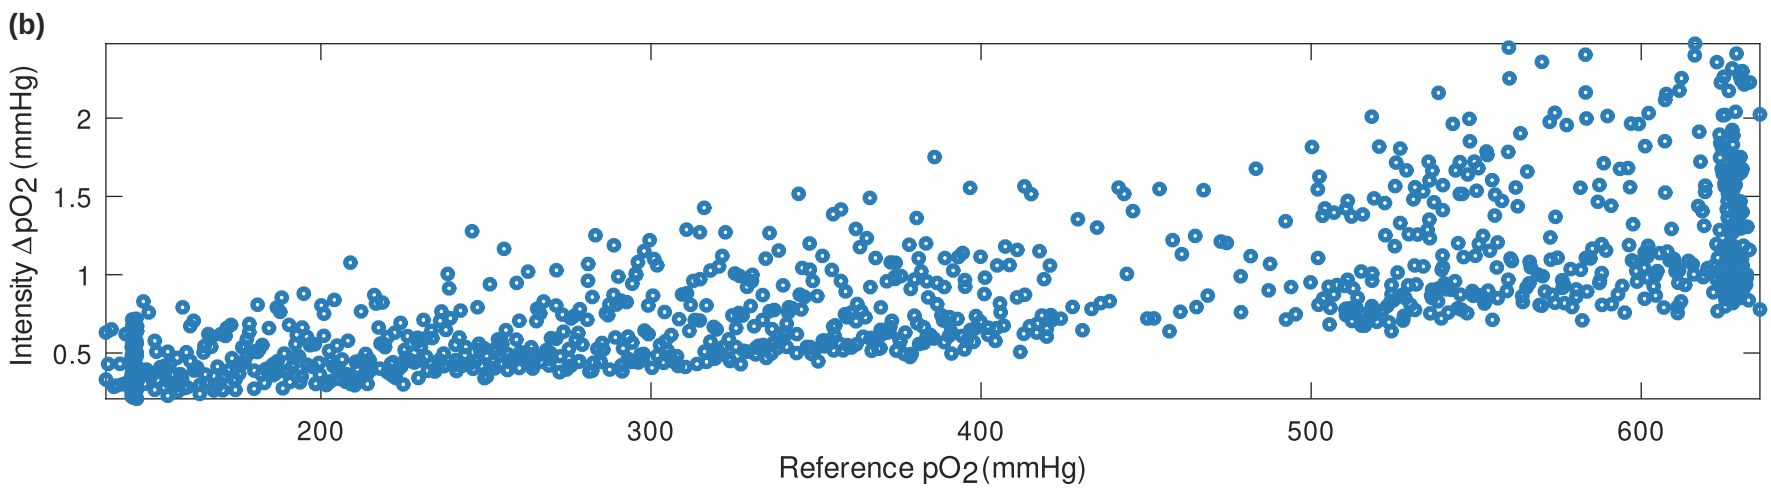

Supplement: d3sd00240c2.zip [file d3sd00240c2.zip]

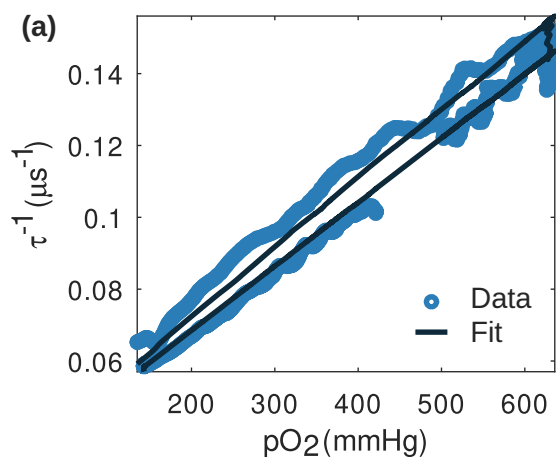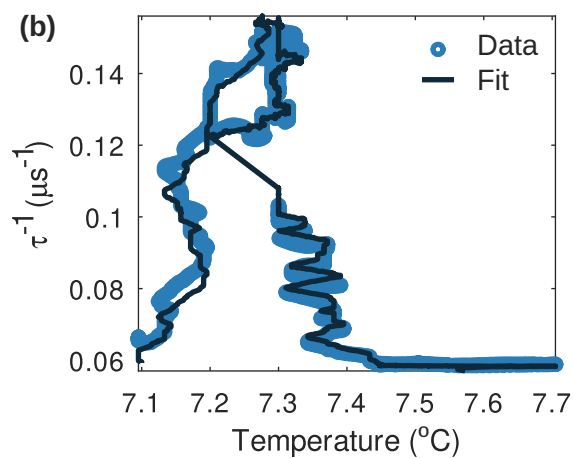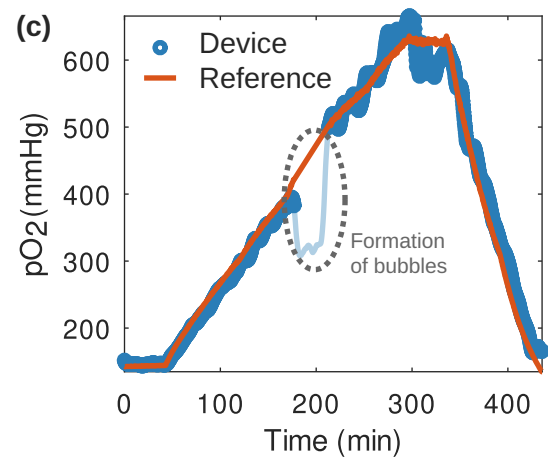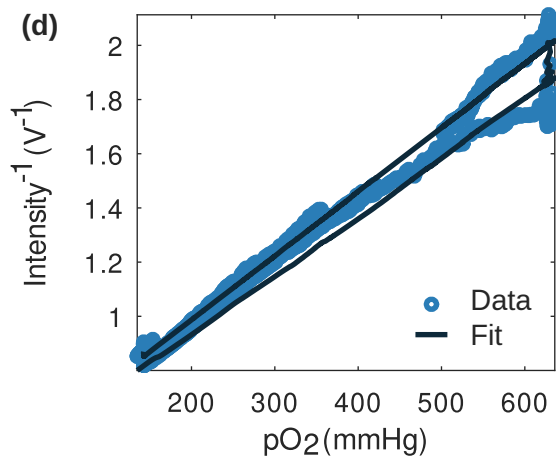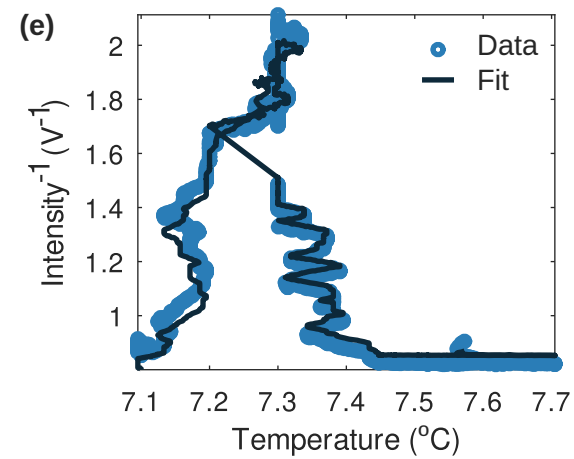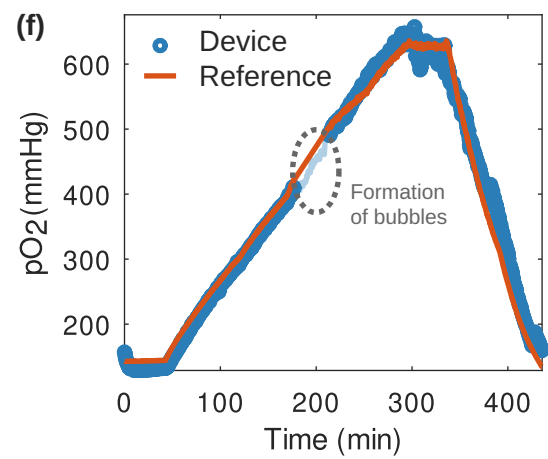

Supplement: d3sd00240c2.zip [file d3sd00240c2.zip]

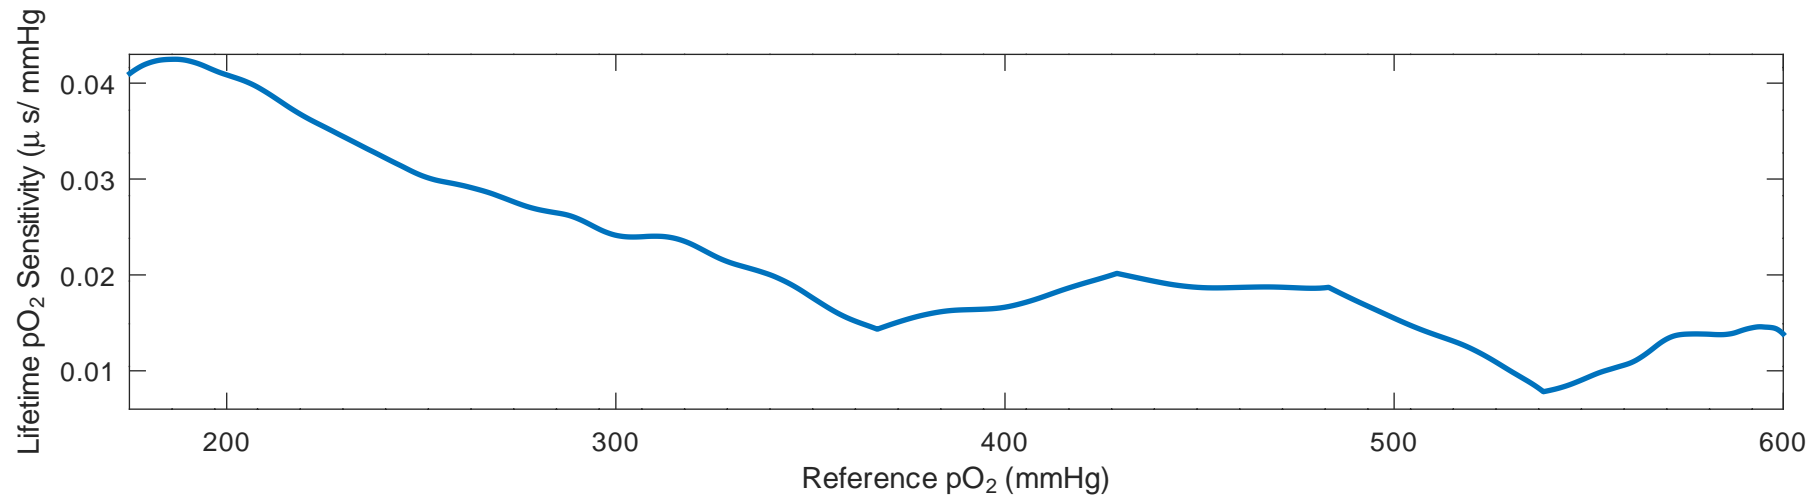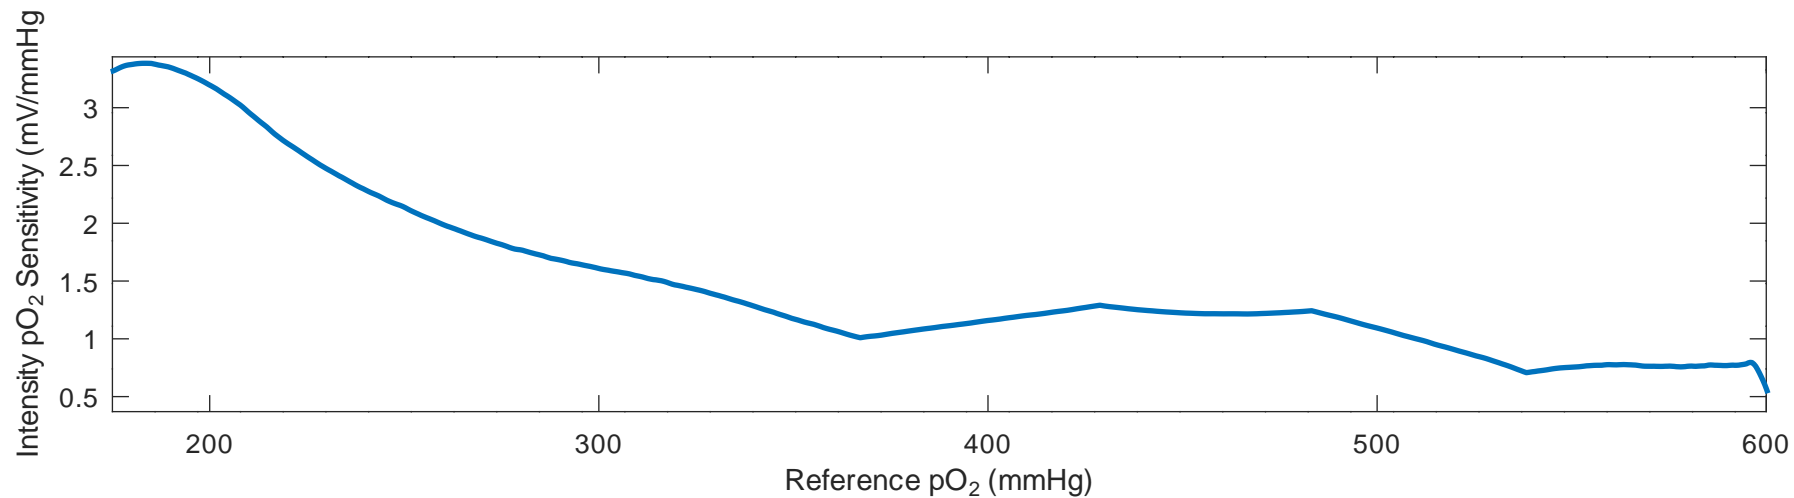

Supplement: d3sd00240c2.zip [file d3sd00240c2.zip]
